# Supplementary material
Source: Springer Nature journal article supplement (https://www.springermedizin.de/resource/supplementary/13075_2009_2795_MOESM2_ESM.pdf/9692902)

**A**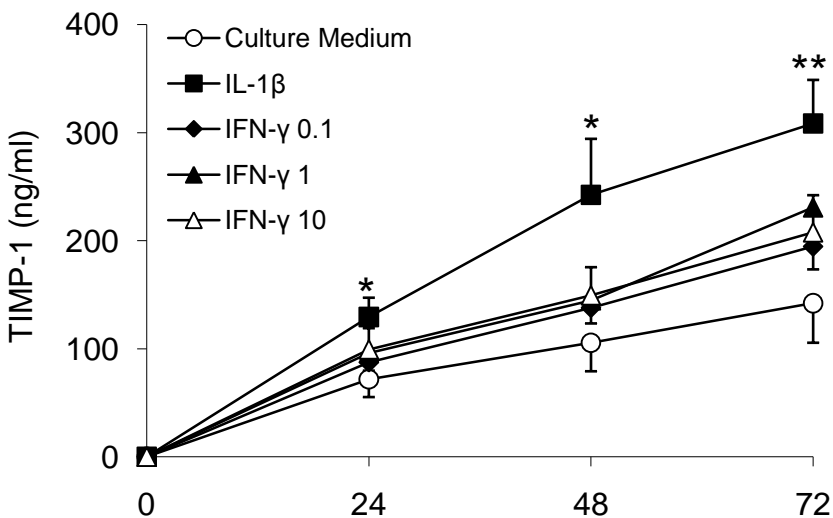**B**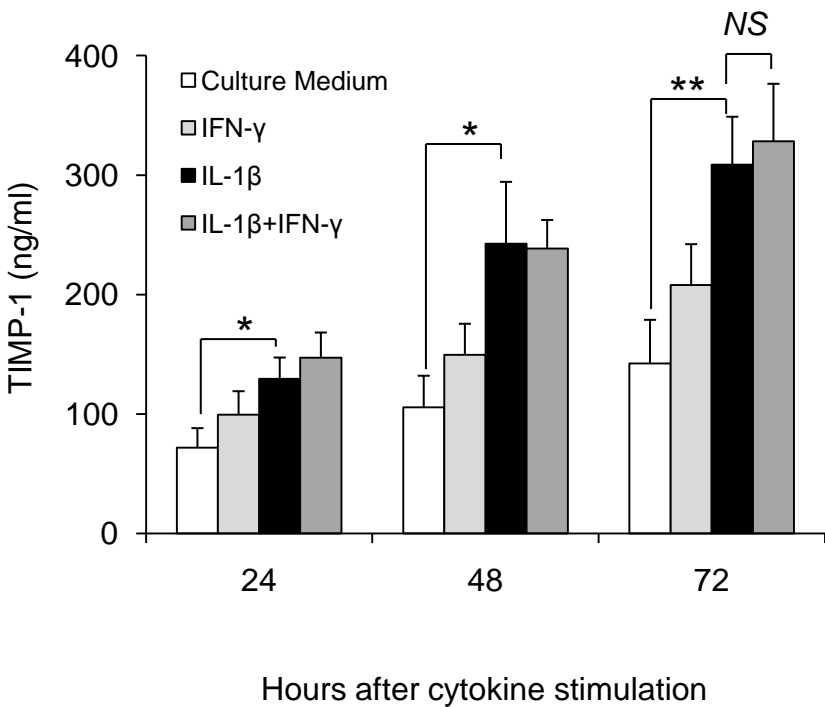

Supplement: MOESM2 [file 9692902]
